# Supplementary material for: SERPINB3 (SCCA1) inhibits cathepsin L and lysoptosis, protecting cervical cancer cells from chemoradiation
Source: PubMed Central journal article supplement (PMC8755728; doi:10.1038/s42003-021-02893-6), 2022-01-12
Supplement: 42003_2021_2893_MOESM3_ESM.pdf [file 42003_2021_2893_MOESM3_ESM.pdf]

## Reporting Summary

Nature Research wishes to improve the reproducibility of the work that we publish. This form provides structure for consistency and transparency in reporting. For further information on Nature Research policies, see our [Editorial Policies](#) and the [Editorial Policy Checklist](#).

### Statistics

For all statistical analyses, confirm that the following items are present in the figure legend, table legend, main text, or Methods section.

n/a Confirmed

- |                                     |                                     |                                                                                                                                                                                                                                                            |
|-------------------------------------|-------------------------------------|------------------------------------------------------------------------------------------------------------------------------------------------------------------------------------------------------------------------------------------------------------|
| <input type="checkbox"/>            | <input checked="" type="checkbox"/> | The exact sample size ( $n$ ) for each experimental group/condition, given as a discrete number and unit of measurement                                                                                                                                    |
| <input type="checkbox"/>            | <input checked="" type="checkbox"/> | A statement on whether measurements were taken from distinct samples or whether the same sample was measured repeatedly                                                                                                                                    |
| <input type="checkbox"/>            | <input checked="" type="checkbox"/> | The statistical test(s) used AND whether they are one- or two-sided<br><i>Only common tests should be described solely by name; describe more complex techniques in the Methods section.</i>                                                               |
| <input checked="" type="checkbox"/> | <input type="checkbox"/>            | A description of all covariates tested                                                                                                                                                                                                                     |
| <input type="checkbox"/>            | <input checked="" type="checkbox"/> | A description of any assumptions or corrections, such as tests of normality and adjustment for multiple comparisons                                                                                                                                        |
| <input type="checkbox"/>            | <input checked="" type="checkbox"/> | A full description of the statistical parameters including central tendency (e.g. means) or other basic estimates (e.g. regression coefficient) AND variation (e.g. standard deviation) or associated estimates of uncertainty (e.g. confidence intervals) |
| <input type="checkbox"/>            | <input checked="" type="checkbox"/> | For null hypothesis testing, the test statistic (e.g. $F$ , $t$ , $r$ ) with confidence intervals, effect sizes, degrees of freedom and $P$ value noted<br><i>Give <math>P</math> values as exact values whenever suitable.</i>                            |
| <input checked="" type="checkbox"/> | <input type="checkbox"/>            | For Bayesian analysis, information on the choice of priors and Markov chain Monte Carlo settings                                                                                                                                                           |
| <input checked="" type="checkbox"/> | <input type="checkbox"/>            | For hierarchical and complex designs, identification of the appropriate level for tests and full reporting of outcomes                                                                                                                                     |
| <input checked="" type="checkbox"/> | <input type="checkbox"/>            | Estimates of effect sizes (e.g. Cohen's $d$ , Pearson's $r$ ), indicating how they were calculated                                                                                                                                                         |

*Our web collection on [statistics for biologists](#) contains articles on many of the points above.*

### Software and code

Policy information about [availability of computer code](#)

|                 |                                                                                                                                                                                                                                                                                                                                                                                                                                                                   |
|-----------------|-------------------------------------------------------------------------------------------------------------------------------------------------------------------------------------------------------------------------------------------------------------------------------------------------------------------------------------------------------------------------------------------------------------------------------------------------------------------|
| Data collection | Gen5(TM) software from BioTek was used for high content imaging of cells in cell death experiments. Autodetection/object identification was optimized for most accurate counts (confirmed visually) for Sytox positive and Hoechst positive nuclei. Leica Application Suite X (LASX) was used to acquire live cell images.                                                                                                                                        |
| Data analysis   | ImageLab 5.2.1 was used to align, overlay and visualize Western blot images, Image J was used to determine densitometry when relevant. MatLab Prism 9 software was used to generate graphs and for statistical analysis of clonogenic survival assays, tumor doubling time, and survival curves. Volocity(R) software was used to quantitate LysoTrackerDR/PI intensity per cell volume in Figure 6. QuPath was used to analyze IHC/TUNEL images in Figure 5 G-P. |

For manuscripts utilizing custom algorithms or software that are central to the research but not yet described in published literature, software must be made available to editors and reviewers. We strongly encourage code deposition in a community repository (e.g. GitHub). See the Nature Research [guidelines for submitting code & software](#) for further information.

### Data

Policy information about [availability of data](#)

All manuscripts must include a [data availability statement](#). This statement should provide the following information, where applicable:

- Accession codes, unique identifiers, or web links for publicly available datasets
- A list of figures that have associated raw data
- A description of any restrictions on data availability

All raw data included in this manuscript including raw blot images, live cell image videos and TEM are available at: <http://dx.doi.org/10.17632/8465mbnxt7.1>, original slide images for TUNEL and CC3 staining of mouse tumors (Figure 5) are available at: [https://app.histowiz.com/shared\\_orders/2ccb0ce8-e4e1-41d1-8f75-a0e621ced36e/slides/](https://app.histowiz.com/shared_orders/2ccb0ce8-e4e1-41d1-8f75-a0e621ced36e/slides/).

## Field-specific reporting

Please select the one below that is the best fit for your research. If you are not sure, read the appropriate sections before making your selection.

Life sciences  Behavioural & social sciences  Ecological, evolutionary & environmental sciences

For a reference copy of the document with all sections, see [nature.com/documents/nr-reporting-summary-flat.pdf](https://www.nature.com/documents/nr-reporting-summary-flat.pdf)

## Life sciences study design

All studies must disclose on these points even when the disclosure is negative.

|                 |                                                                                                                                                                                                                                                                                                                                                                                                                                                                                                                                                                                                                                                                                                                                                                                                                                                                                                                                                                                                                                                                                                                                                                                                                                    |
|-----------------|------------------------------------------------------------------------------------------------------------------------------------------------------------------------------------------------------------------------------------------------------------------------------------------------------------------------------------------------------------------------------------------------------------------------------------------------------------------------------------------------------------------------------------------------------------------------------------------------------------------------------------------------------------------------------------------------------------------------------------------------------------------------------------------------------------------------------------------------------------------------------------------------------------------------------------------------------------------------------------------------------------------------------------------------------------------------------------------------------------------------------------------------------------------------------------------------------------------------------------|
| Sample size     | For in vivo mouse tumor model experiments, based on our published and preliminary in vitro data, using a Bonferroni correction with 0.05 significance, 80% power and a two-sided t-test, we estimated needing 4 mice per group to determine an effect size of 3.5 for tumor growth kinetics, and for irradiation experiments we expect a sample size of 3 mice per group is necessary to determine a very conservative effect size of 5 in tumor growth delay. Thus, 5 animals were inoculated with tumor allowing for 20% drop out. All animals that developed tumors were included in the analysis. For live cell time course imaging studies, the maximal number of fields were calculated as the number of fields that could be successfully imaged within the time points based on hardware limitations. For live-cell single time point imaging studies by confocal microscopy, and for gH2AX foci image quantitation, the sample size was $n \geq 5$ unless otherwise stated. Images presented are representative, and experiments to generate the images were repeated at least 3 times for biologic reproducibility. For 96 well plate imaging experiments $n \geq 3$ wells were used to measure intra-assay variability. |
| Data exclusions | For automated imaging assays, any wells/fields of view that were out-of-focus or otherwise immeasurable were excluded from data analysis. Mice that did not develop subcutaneous tumors were not included for randomization in tumor growth/growth delay.                                                                                                                                                                                                                                                                                                                                                                                                                                                                                                                                                                                                                                                                                                                                                                                                                                                                                                                                                                          |
| Replication     | Cell-based experiments were replicated $n \geq 3$ times to ensure reproducibility                                                                                                                                                                                                                                                                                                                                                                                                                                                                                                                                                                                                                                                                                                                                                                                                                                                                                                                                                                                                                                                                                                                                                  |
| Randomization   | Mice having developed tumors were randomized to sham or radiation groups. Cell based experiments were not randomized, but plated in replicates from the same stock plate/passage number.                                                                                                                                                                                                                                                                                                                                                                                                                                                                                                                                                                                                                                                                                                                                                                                                                                                                                                                                                                                                                                           |
| Blinding        | TEM images were scored by laboratory personnel blinded to the treatment and genotype.                                                                                                                                                                                                                                                                                                                                                                                                                                                                                                                                                                                                                                                                                                                                                                                                                                                                                                                                                                                                                                                                                                                                              |

## Reporting for specific materials, systems and methods

We require information from authors about some types of materials, experimental systems and methods used in many studies. Here, indicate whether each material, system or method listed is relevant to your study. If you are not sure if a list item applies to your research, read the appropriate section before selecting a response.

### Materials & experimental systems

| n/a                                 | Involvement in the study                                        |
|-------------------------------------|-----------------------------------------------------------------|
| <input type="checkbox"/>            | <input checked="" type="checkbox"/> Antibodies                  |
| <input type="checkbox"/>            | <input checked="" type="checkbox"/> Eukaryotic cell lines       |
| <input checked="" type="checkbox"/> | <input type="checkbox"/> Palaeontology and archaeology          |
| <input type="checkbox"/>            | <input checked="" type="checkbox"/> Animals and other organisms |
| <input checked="" type="checkbox"/> | <input type="checkbox"/> Human research participants            |
| <input checked="" type="checkbox"/> | <input type="checkbox"/> Clinical data                          |
| <input checked="" type="checkbox"/> | <input type="checkbox"/> Dual use research of concern           |

### Methods

| n/a                                 | Involvement in the study                           |
|-------------------------------------|----------------------------------------------------|
| <input checked="" type="checkbox"/> | <input type="checkbox"/> ChIP-seq                  |
| <input type="checkbox"/>            | <input checked="" type="checkbox"/> Flow cytometry |
| <input checked="" type="checkbox"/> | <input type="checkbox"/> MRI-based neuroimaging    |

## Antibodies

|                 |                                                                                                                                                                                       |
|-----------------|---------------------------------------------------------------------------------------------------------------------------------------------------------------------------------------|
| Antibodies used | All antibody information including supplier, clone, dilution used and incubation parameters are described in the methods section.                                                     |
| Validation      | Biologic positive and negative controls were used to validate the antibodies. Antibodies used were selected based on the published QA literature and confirmed in our hands as above. |

## Eukaryotic cell lines

Policy information about [cell lines](#)

|                     |                                                                                                                                         |
|---------------------|-----------------------------------------------------------------------------------------------------------------------------------------|
| Cell line source(s) | All parental ATCC lines were obtained directly from ATCC. Genetically modified lines were engineered from early passage parental cells. |
| Authentication      | STR profiling was performed for any lines genetically modified and those passaged longer than 1 year from ATCC purchase.                |

|                                                                      |                                                                                                                                                                                                 |
|----------------------------------------------------------------------|-------------------------------------------------------------------------------------------------------------------------------------------------------------------------------------------------|
| Mycoplasma contamination                                             | All cell lines were tested for mycoplasma every 3-6 months and any lines with evidence of mycoplasma infection were discarded and data since previous negative test were not used for analysis. |
| Commonly misidentified lines<br>(See <a href="#">ICLAC</a> register) | N/A                                                                                                                                                                                             |

## Animals and other organisms

Policy information about [studies involving animals](#); [ARRIVE guidelines](#) recommended for reporting animal research

|                         |                                                                                                                                                                                                                                                                                                                                                                                                    |
|-------------------------|----------------------------------------------------------------------------------------------------------------------------------------------------------------------------------------------------------------------------------------------------------------------------------------------------------------------------------------------------------------------------------------------------|
| Laboratory animals      | Mouse tumor studies used female athymic nude mice obtained from Charles River Labs CRL:NU (NCR)-FOXN1 NU (Homozygous), injected at 6-8 weeks of age. Only female mice were utilized given the hormonal/genetic background of patients with cervical cancer which occurs exclusively in women.                                                                                                      |
| Wild animals            | N/A                                                                                                                                                                                                                                                                                                                                                                                                |
| Field-collected samples | N/A                                                                                                                                                                                                                                                                                                                                                                                                |
| Ethics oversight        | The methods were performed in accordance with relevant guidelines and regulations and approved by the Washington University Institutional Biological & Chemical Safety Committee. All mouse experiments were performed in accordance with relevant guidelines and regulations and approved by the Washington University Institute Institutional Animal Care and Use Committee (Protocol #20-0470). |

Note that full information on the approval of the study protocol must also be provided in the manuscript.

## Flow Cytometry

### Plots

Confirm that:

- The axis labels state the marker and fluorochrome used (e.g. CD4-FITC).
- The axis scales are clearly visible. Include numbers along axes only for bottom left plot of group (a 'group' is an analysis of identical markers).
- All plots are contour plots with outliers or pseudocolor plots.
- A numerical value for number of cells or percentage (with statistics) is provided.

### Methodology

|                           |                                                                                                                                                                                                                                                                                                                   |
|---------------------------|-------------------------------------------------------------------------------------------------------------------------------------------------------------------------------------------------------------------------------------------------------------------------------------------------------------------|
| Sample preparation        | Cells were cultured under indicated conditions for the indicated time then trypsinized (combined with non-adherent cells), permeabilized with a Triton-X citrate buffer containing propidium iodide, and analyzed by flow cytometer immediately after 40 minute incubation and filtration through a mesh strainer |
| Instrument                | MACSQuant Analyzer 10                                                                                                                                                                                                                                                                                             |
| Software                  | FlowJo(TM) v10.7                                                                                                                                                                                                                                                                                                  |
| Cell population abundance | Single cells comprised ~90% of the total events.                                                                                                                                                                                                                                                                  |
| Gating strategy           | Cells were gated by excluding debris on FSC-A (X axis) v SSC-A (y-axis) the single cells were gated on FSC-A vs FSC-H. This population was subject to cell cycle analysis on PI-A histogram for cell count (y-axis). Raw data are included in the revised manuscript supplemental.                                |

- Tick this box to confirm that a figure exemplifying the gating strategy is provided in the Supplementary Information.
